# Supplementary material
Source: Springer Nature journal article supplement (https://www.springermedizin.de/resource/supplementary/12955_2012_1152_MOESM3_ESM.pdf/9559344)
Supplement: MOESM3 [file 9559344]

Date:

# Major Life Changing Decisions Profile

## MLCDP

**Instructions:** The aim of this profile is to measure how your health condition has influenced major life decisions in your life. For each statement please tick one box.

**A**

### EDUCATION

*The following statements refer to the influence of your chronic condition on your decisions about your education.*

|                                         | No influence OR<br>Not applicable | Slight influence         | Moderate influence       | Strong influence         | Very strong<br>influence |
|-----------------------------------------|-----------------------------------|--------------------------|--------------------------|--------------------------|--------------------------|
| 1. I decided to leave education early   | <input type="checkbox"/>          | <input type="checkbox"/> | <input type="checkbox"/> | <input type="checkbox"/> | <input type="checkbox"/> |
| 2. I decided to change my study subject | <input type="checkbox"/>          | <input type="checkbox"/> | <input type="checkbox"/> | <input type="checkbox"/> | <input type="checkbox"/> |
| 3. I decided to study near home         | <input type="checkbox"/>          | <input type="checkbox"/> | <input type="checkbox"/> | <input type="checkbox"/> | <input type="checkbox"/> |

**B**

### JOB / CAREER

*The following statements refer to the influence of your chronic condition on your decisions about your job / career.*

|                                                            |                          |                          |                          |                          |                          |
|------------------------------------------------------------|--------------------------|--------------------------|--------------------------|--------------------------|--------------------------|
| 1. I decided to change my job/career                       | <input type="checkbox"/> |
| 2. I decided to give up my job/career after starting       | <input type="checkbox"/> |
| 3. I decided to take early retirement                      | <input type="checkbox"/> |
| 4. I decided to work flexible working hours                | <input type="checkbox"/> |
| 5. I decided to select a job/career suitable for my health | <input type="checkbox"/> |
| 6. I decided not to take promotion                         | <input type="checkbox"/> |
| 7. I decided to work shorter hours                         | <input type="checkbox"/> |
| 8. I decided to become self-employed                       | <input type="checkbox"/> |
| 9. I decided to remain unemployed                          | <input type="checkbox"/> |
